# Supplementary material
Source: publisher site journal article supplement (https://www.spandidos-publications.com/7015/downloadSupplementary)
Supplement: Supplementary file 1 [file downloadSupplementary]

## Sheet: Sheet1
Table SVIII. 76 DEGs of clusters A and B.
id	logFC	AveExpr	t	P-value	adj. P-value	B
GZMB	2.42692	5.64219	44.0498	6.0256e-246	1.06123e-241	546.677
IRF1	0.686501	6.62203	16.2956	1.07996e-53	9.51009e-50	111.064
GNLY	1.01147	3.93808	16.1555	6.82486e-53	4.00665e-49	109.244
CXCL9	1.50827	5.79908	15.9213	1.45741e-51	5.13359e-48	106.223
IDO1	1.30838	4.85429	15.893	2.1056e-51	6.18065e-48	105.86
CXCL10	1.42602	6.32888	15.3105	3.74881e-48	9.43201e-45	98.4737
GBP5	0.859232	3.617	15.091	6.00197e-47	1.32133e-43	95.7374
GZMA	1.07823	4.87128	15.0189	1.48481e-46	2.9056e-43	94.8437
NKG7	0.93537	4.60632	15.009	1.68153e-46	2.9615e-43	94.7209
BATF2	0.71189	6.21078	14.6853	9.4394e-45	1.51133e-41	90.7472
GZMH	0.84349	3.67642	14.4642	1.42964e-43	1.93684e-40	88.0663
GBP4	0.891775	4.50493	14.4257	2.28868e-43	2.87915e-40	87.6021
GBP1	0.790238	5.82569	14.1457	6.82152e-42	7.50878e-39	84.2538
IL2RB	0.691428	4.93048	14.1244	8.81568e-42	9.13305e-39	84.0009
STAT1	0.682147	7.37668	13.884	1.56319e-40	1.5295e-37	81.1651
LAG3	0.598592	3.26333	13.4622	2.23608e-38	2.07273e-35	76.2713
CD8A	0.760911	4.30118	13.1079	1.32799e-36	1.06312e-33	72.2451
PSMB9	0.684917	7.67306	12.9282	1.02175e-35	7.19806e-33	70.234
CCL5	0.906656	5.8535	12.856	2.30674e-35	1.56255e-32	69.4314
PRF1	0.705075	4.66419	12.7675	6.23271e-35	3.92038e-32	68.4519
CXCL13	1.28273	4.10488	12.6851	1.56518e-34	9.50552e-32	67.5445
TAP1	0.608082	7.99033	12.6671	1.91275e-34	1.12291e-31	67.3469
CD2	0.734679	5.15072	12.6026	3.91725e-34	2.1998e-31	66.6405
CASP1	0.798204	6.52319	12.3657	5.33042e-33	2.60776e-30	64.0684
CD3D	0.637255	5.68963	12.0376	1.86033e-31	8.40107e-29	60.5692
IFITM1	0.59885	10.7372	11.9676	3.93729e-31	1.73359e-28	59.8308
UBE2L6	0.602832	7.64589	11.8789	1.0118e-30	4.04997e-28	58.9014
HLA-DMB	0.723655	6.04119	11.8447	1.45305e-30	5.68693e-28	58.545
SLAMF7	0.714771	4.10143	11.5202	4.35653e-29	1.53454e-26	55.197
CCL4	0.710708	5.20131	11.1549	1.83445e-27	5.29646e-25	51.5161
HLA-DRA	0.855972	9.92324	11.0895	3.54725e-27	9.7616e-25	50.8673
AIM2	0.751557	3.38655	10.9446	1.5139e-26	3.80898e-24	49.4397
HLA-DPA1	0.822746	7.20632	10.9014	2.32518e-26	5.76776e-24	49.0176
CXCL11	1.16566	4.49941	10.8956	2.46504e-26	6.02977e-24	48.9602
PLA2G7	0.634689	4.86161	10.8371	4.39915e-26	1.047e-23	48.3905
ACP5	0.59826	6.45879	10.8113	5.67539e-26	1.29812e-23	48.14
HLA-DMA	0.702731	6.8259	10.7951	6.65591e-26	1.50287e-23	47.9832
MMP12	0.953089	7.98236	10.6729	2.20701e-25	4.74022e-23	46.8044
IFIT3	0.687449	5.85394	10.4485	1.93777e-24	3.70956e-22	44.6685
SLAMF8	0.589691	4.46883	10.0952	5.49377e-23	9.21488e-21	41.3816
EPSTI1	0.621661	6.281	9.97727	1.64335e-22	2.58416e-20	40.3053
HLA-DQB1	0.717588	5.30871	9.77578	1.04272e-21	1.53036e-19	38.4908
TNFSF13B	0.601854	4.45038	9.63926	3.58253e-21	4.89112e-19	37.2791
CCL8	0.705977	3.95538	9.54188	8.56578e-21	1.07727e-18	36.4235
FCER1G	0.651022	6.42163	9.52903	9.6044e-21	1.19122e-18	36.3112
C1QB	0.689165	7.31186	9.51926	1.04773e-20	1.28144e-18	36.2258
FPR3	0.604314	4.81605	9.25745	1.0475e-19	1.16763e-17	33.9669
CAPN8	-0.646202	5.50466	-9.11243	3.66464e-19	3.84176e-17	32.7388
C1QA	0.600853	7.33264	9.00021	9.54845e-19	9.20743e-17	31.8
LY6E	0.622271	7.38464	8.92955	1.73605e-18	1.63505e-16	31.214
C1QC	0.594152	7.74361	8.48136	7.01648e-17	5.64266e-15	27.5907
COLCA2	-0.639047	4.15749	-8.34254	2.13517e-16	1.60704e-14	26.5016
CCL18	0.879834	6.09058	8.10868	1.34327e-15	9.06426e-14	24.7027
MLPH	-0.618691	6.37598	-7.94754	4.64692e-15	2.88175e-13	23.4896
BCL2A1	0.602048	4.64011	7.57294	7.65463e-14	3.89634e-12	20.7538
TFF3	-0.636677	10.7373	-7.45671	1.78263e-13	8.37217e-12	19.9291
ERP27	0.657861	4.31654	7.31326	4.98161e-13	2.21556e-11	18.9272
LINC00261	-0.675034	5.0358	-6.91513	7.87327e-12	2.76775e-10	16.2394
TFF1	-0.87835	9.06752	-6.88353	9.74502e-12	3.37853e-10	16.0319
VSIG2	-0.693776	5.44406	-6.72773	2.75411e-11	8.75549e-10	15.0219
MMP3	0.797032	6.7497	6.59515	6.55799e-11	1.95792e-09	14.1792
HLA-DQA1	0.661585	5.23809	6.44016	1.77345e-10	4.88794e-09	13.2137
MMP1	0.80275	7.55541	6.36822	2.79431e-10	7.40051e-09	12.7728
SLITRK6	-0.607725	2.97838	-6.3646	2.85865e-10	7.55955e-09	12.7508
CKMT2	0.654862	4.10144	5.85971	6.10536e-09	1.25032e-07	9.78823
IGLJ3	0.598671	4.39401	5.82008	7.69021e-09	1.5356e-07	9.56539
IGHM	0.63861	6.9971	5.80946	8.17859e-09	1.62575e-07	9.50595
IGLV1-44	0.58881	6.201	5.50353	4.62087e-08	7.68487e-07	7.83674
MUC2	-0.82387	7.44368	-5.33582	1.15235e-07	1.74508e-06	6.95798
CEL	0.741279	5.29468	5.13225	3.37772e-07	4.47884e-06	5.926
FCGBP	-0.702144	6.8927	-4.76429	2.14624e-06	2.29925e-05	4.15803
SPINK4	-0.785814	7.53523	-4.61291	4.43234e-06	4.30808e-05	3.4673
TCN1	-0.639209	4.84425	-4.58418	5.07444e-06	4.86672e-05	3.33864
CTSE	-0.596712	5.17652	-4.48427	8.07604e-06	7.29038e-05	2.89718
LEFTY1	-0.647187	6.76659	-4.29898	1.86654e-05	0.000153256	2.10336
REG4	-0.637472	6.73007	-3.66493	0.000259097	0.00148834	-0.36698
